# Supplementary material for: A quantitative model used to compare within-host SARS-CoV-2, MERS-CoV, and SARS-CoV dynamics provides insights into the pathogenesis and treatment of SARS-CoV-2
Source: PLoS Biol. 2021 Mar 22;19(3):e3001128. doi: 10.1371/journal.pbio.3001128 (PMC7984623; doi:10.1371/journal.pbio.3001128)
Supplement: S10 Data — (XLSX) [file pbio.3001128.s010.xlsx]

## Sheet: Without the therapy
T(0)

## Sheet: Left_Blue
T(0)

## Sheet: Center_Blue
T(0)

## Sheet: Right_Blue
T(0)

## Sheet: Left_Red
T(0)

## Sheet: Center_Red
T(0)

## Sheet: Right_Red
T(0)
